# Supplementary material for: Vaccine-mediated protection against Merbecovirus and Sarbecovirus challenge in mice
Source: PubMed Central journal article supplement — Cell Rep. Author manuscript; Available in PMC 2024 Feb 5. (PMC10842144; doi:10.1016/j.celrep.2023.113248), 2023-10-18
Supplement: NIHMS1941898-supplement-1.pdf [file NIHMS1941898-supplement-1.pdf]

**Supplemental information**

**Vaccine-mediated protection against *Merbecovirus*  
and *Sarbecovirus* challenge in mice**

**David R. Martinez, Alexandra Schäfer, Tyler D. Gavitt, Michael L. Mallory, Esther Lee, Nicholas J. Catanzaro, Haiyan Chen, Kendra Gully, Trevor Scobey, Pooja Korategere, Alecia Brown, Lena Smith, Robert Parks, Maggie Barr, Amanda Newman, Cindy Bowman, John M. Powers, Erik J. Soderblom, Katayoun Mansouri, Robert J. Edwards, Ralph S. Baric, Barton F. Haynes, and Kevin O. Saunders**

1 Supplemental Information

Figure S1

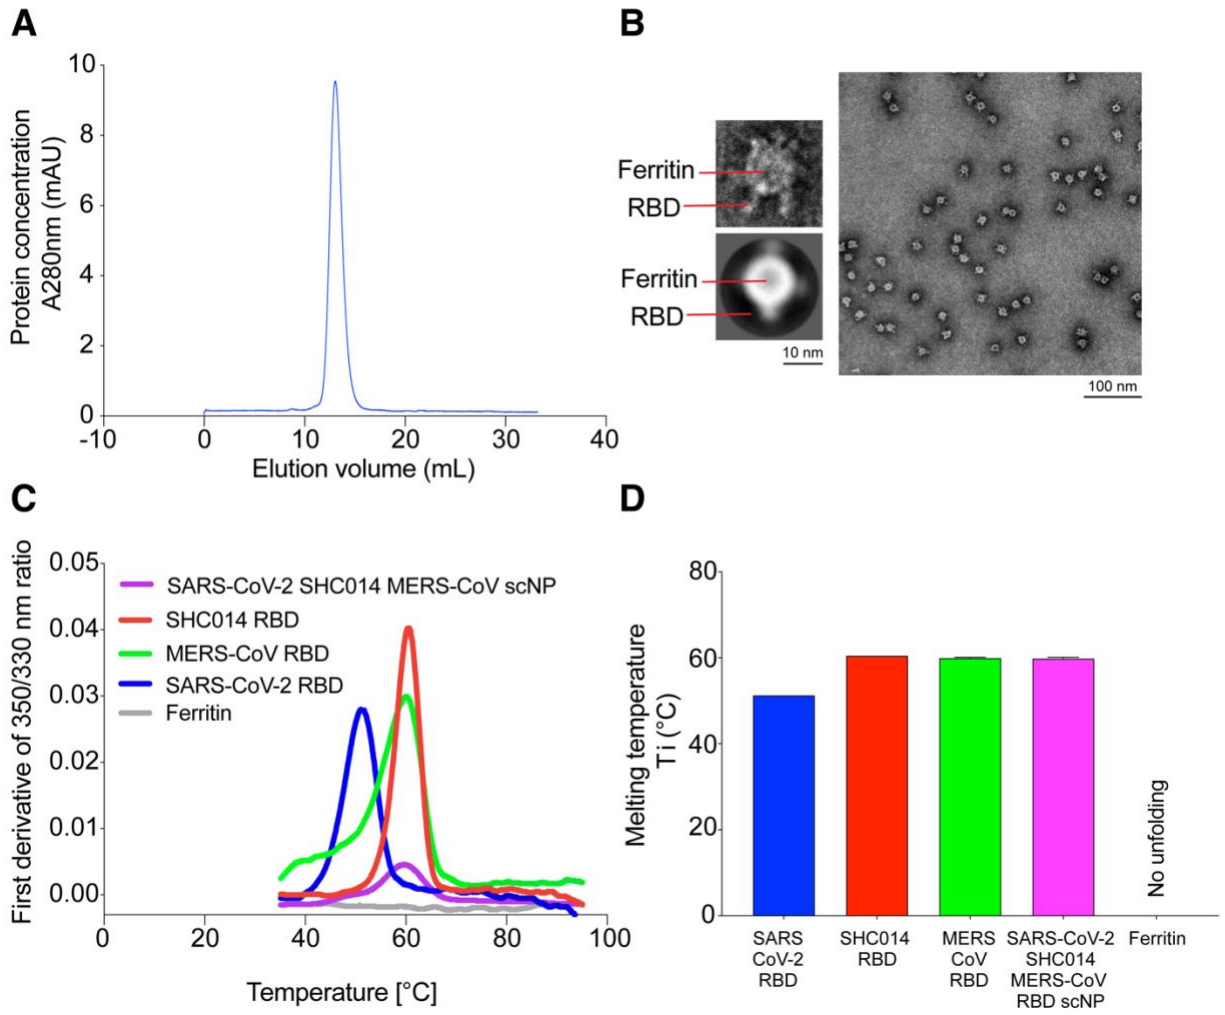

2

3

4

5

6

7

8

9 **Figure S1. Structural and biophysical characterization of the trivalent SARS-CoV-**  
10 **2/SHC014/MERS RBD scNP.** (A) Analytical size exclusion chromatography with a Superose6  
11 column showing a homogenous protein nanoparticle at the expected elution volume. (B)  
12 Negative stain electron microscopy of trivalent RBD scNP. 2D class average is shown on the  
13 bottom left and a raw image of a single nanoparticle is shown on the top left. The raw image of  
14 the carbon grid is shown on the right. (C and D) Differential scanning fluorimetry of the  
15 individual components and assembled trivalent RBD scNP. Melting temperature is defined as the  
16 inflection temperature ( $T_i$ ) on the 350 nm/330 nm ratio curve. Symbols represent values from  
17 independent experiments with bars representing the mean of the two independent experiments.

18

19

20

21

22

23

24

25

26

27

28

# Figure S2

## MERS-CoV challenge

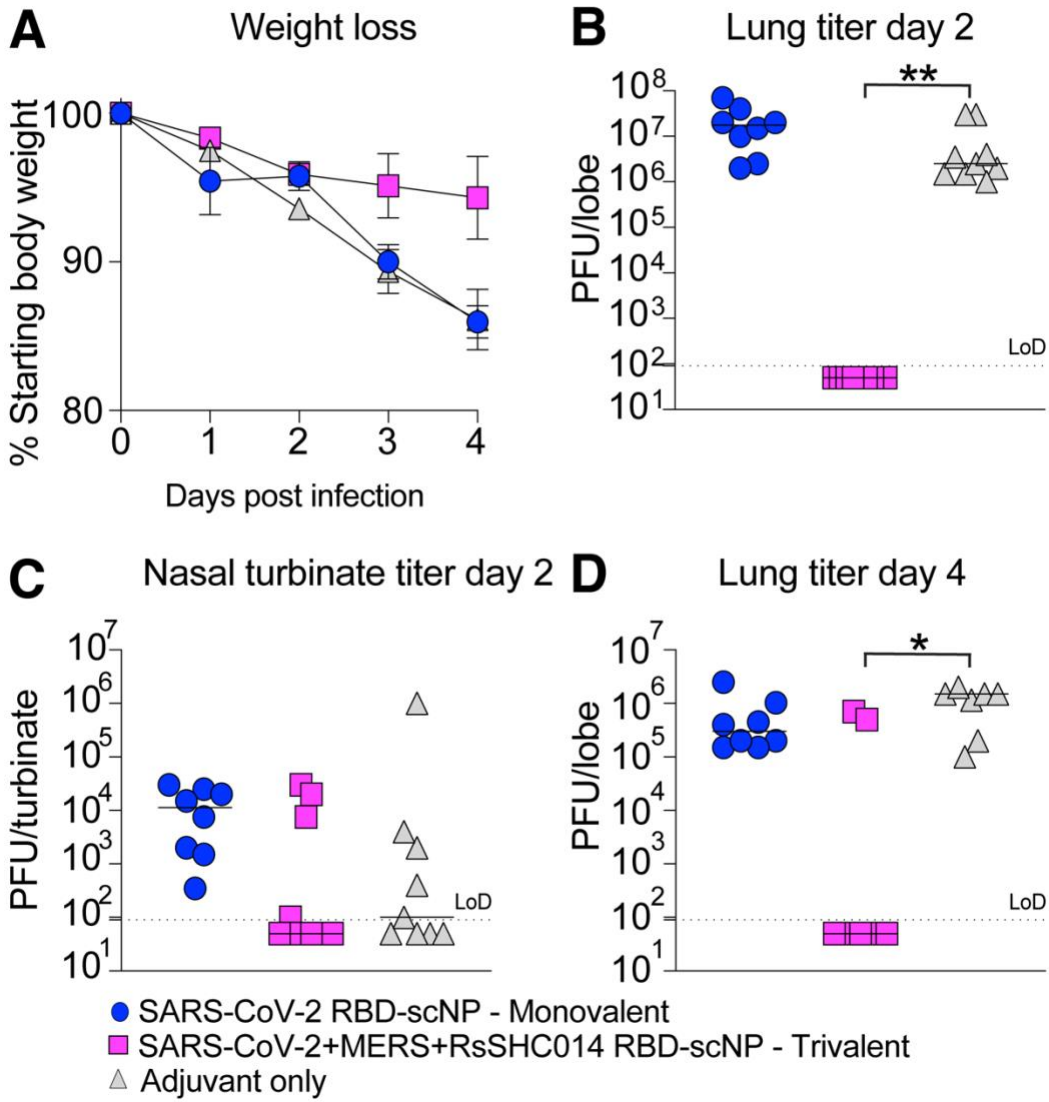

29

30

31

32

33

34

35 **Figure S2. Protective efficacy of monovalent vs trivalent RBD scNP vaccines against**  
36 **MERS-CoV challenge in 2X vaccinated mice. (A)** Weight loss following MERS-CoV  
37 intranasal challenge in monovalent, trivalent, and adjuvant-only vaccinated mice. **(B)** Infectious  
38 virus replication in the lung at day 2 post infection. **(C)** Infectious virus replication at day 2 post  
39 infection in nasal turbinates. **(D)** Infectious virus replication at day 4 post infection. A Kruskal-  
40 Wallis test with a Dunn's multiple comparison correction test was used for calculating statistical  
41 significance in all panels. \*P < 0.05, \*\*P < 0.005, \*\*\*P < 0.0005, and \*\*\*\*P < 0.0001

42

43

44

45

46

47

48

49

50

51

52

53

54

55

56

57

**Figure S3**

**A**

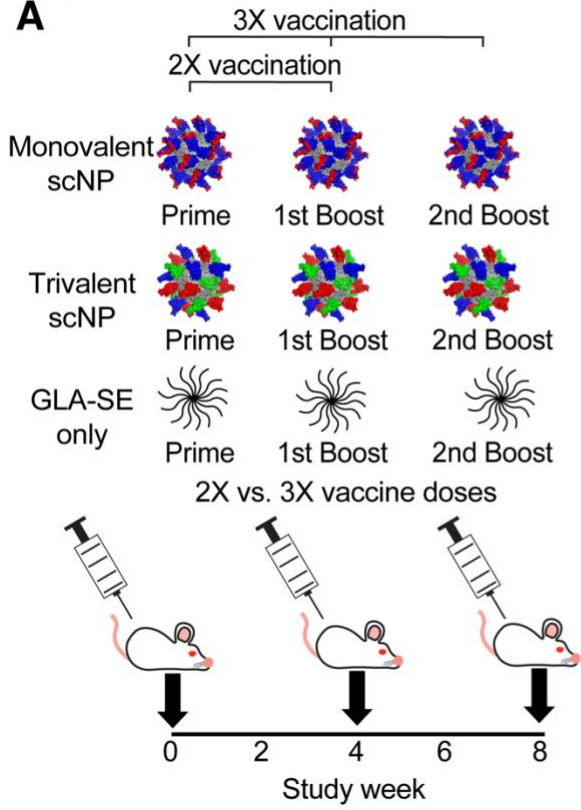

**B**

| RBD Antigens   | Monovalent |       | Trivalent |       | GLA-SE |      | Binding (Log AUC) |
|----------------|------------|-------|-----------|-------|--------|------|-------------------|
|                | 2x NP      | 3x NP | 2x NP     | 3x NP | 2x     | 3x   |                   |
| CanineCoV HuPn | 0.36       | 0.71  | 0.30      | 0.33  | 0.29   | 0.26 |                   |
| hCoV OC43      | 0.25       | 0.72  | 0.25      | 0.24  | 0.27   | 0.24 |                   |
| WIV-1          | 5.42       | 7.20  | 6.49      | 7.02  | 0.27   | 0.25 |                   |
| GZ02           | 5.93       | 8.18  | 7.25      | 7.88  | 0.29   | 0.25 |                   |
| ZC45           | 4.25       | 6.53  | 4.90      | 5.80  | 0.24   | 0.25 |                   |
| GXP4L          | 6.93       | 9.00  | 6.76      | 7.82  | 0.25   | 0.24 |                   |
| BANAL-236      | 7.88       | 9.92  | 7.29      | 8.35  | 0.26   | 0.26 |                   |
| MERS           | 0.24       | 0.98  | 7.27      | 7.98  | 0.24   | 0.25 |                   |
| NL140422       | 0.25       | 0.71  | 1.09      | 1.50  | 0.27   | 0.23 |                   |
| HKU4           | 0.24       | 0.93  | 0.52      | 1.41  | 0.24   | 0.25 |                   |
| HKU5           | 0.25       | 1.02  | 2.75      | 5.23  | 0.26   | 0.25 |                   |
| BtKY06         | 0.29       | 0.32  | 0.38      | 0.34  | 0.28   | 0.29 |                   |
| PdCoV          | 0.32       | 0.75  | 0.29      | 0.31  | 0.25   | 0.25 |                   |

58

59

60

61

62

63

64

65

66

67

68

69 **Figure S3. Immunogenicity of monovalent vs trivalent RBD scNP vaccines in 2X vs 3X**  
70 **vaccinated mice.** (A) vaccination schema with monovalent scNP, trivalent scNP, and adjuvant  
71 only (GLA-SE). (B) LogAUC IgG binding comparison of 2X (prime-boost) vs 3X (prime-boost-  
72 boost) vaccinated mice with monovalent, trivalent, and adjuvant-only against genetically  
73 divergent RBDs from Group 1 (canineCoV-HuPn). Group 2a (OC43), Group 2b (WIV-1, GZ02,  
74 ZC45, GXP4L, and BANAL-236), Group 2c (MERS-CoV, NL140422, HKU4, and HKU5),  
75 Group 2d (BtKY06), and Group 4 (Porcine deltacoronavirus Haiti).

76  
77  
78  
79  
80  
81  
82  
83  
84  
85  
86  
87  
88  
89  
90  
91  
92  
93  
94  
95  
96  
97  
98  
99  
100  
101  
102  
103  
104  
105  
106  
107

108  
109  
110  
111

Supplementary Table 1. Mass spectrometry quantification of receptor binding domain (RBD) abundance in trivalent RBD nanoparticle vaccine.

| Protein Name   | Abundance:<br>Lot#1: Sample | Abundance:<br>Lot#2: Sample | Abundance:<br>Lot#3: Sample | Average    | Standard<br>Deviation | Ratio<br>Lot#1 to<br>MERS | Ratio<br>Lot#2 to<br>MERS | Ratio<br>Lot#3 to<br>MERS | Avg Ratio<br>to MERS | Standard<br>Deviation<br>Ratio to<br>MERS |
|----------------|-----------------------------|-----------------------------|-----------------------------|------------|-----------------------|---------------------------|---------------------------|---------------------------|----------------------|-------------------------------------------|
| MERS-CoV RBD   | 739055837                   | 909817735                   | 894822235                   | 847898602  | 94558325.36           | 1                         | 1                         | 1                         | 1                    | 0                                         |
| SARS-CoV-2 RBD | 868638091                   | 938426136                   | 844043588                   | 883702605  | 48961423.89           | 1.2                       | 1.0                       | 0.9                       | 1.1                  | 0.1                                       |
| RsSHC014 RBD   | 1185580726                  | 1054705449                  | 948483177                   | 1062923117 | 118762197.5           | 1.6                       | 1.2                       | 1.1                       | 1.3                  | 0.3                                       |

112  
113  
114  
115  
116  
117
